# Supplementary material
Source: HighWire-hosted journal article supplement (http://www.jrheum.org/highwire/filestream/34546/field_highwire_adjunct_files/0/171315DataSuppl.pdf)
Supplement: 171315DataSuppl.pdf [file 171315DataSuppl.pdf]

ONLINE SUPPLEMENTARY DATA

**Supplementary Table 1.** All-cause healthcare utilization and costs (2014 US \$) over 5 year of follow-up for incident RA-ILD patients

|                                             | <b>Year 1-5</b>                     | <b>Year 1</b>                   | <b>Year 2</b>                      | <b>Year 3</b>                      | <b>Year 4</b>                      | <b>Year 5</b>                      |
|---------------------------------------------|-------------------------------------|---------------------------------|------------------------------------|------------------------------------|------------------------------------|------------------------------------|
|                                             |                                     |                                 |                                    |                                    |                                    |                                    |
| <b>Inpatient admissions</b>                 | 537<br>(71.6%)                      | 271 (36.1%)                     | 194 (25.9%)                        | 187 (24.9%)                        | 217<br>(28.9%)                     | 207<br>(27.6%)                     |
| Mean (SD) Costs, all patients               | \$41,066<br>(\$83,796)              | \$10,437<br>(\$32,784)          | \$6,379<br>(\$22,794)              | \$6,179<br>(\$23,752)              | \$9,332<br>(\$35,203)              | \$8,739<br>(\$33,222)              |
| Median (IQR), all patients                  | \$14,797<br>(\$0,<br>\$43,368)      | \$0 (\$0, \$9,116)              | \$0 (\$0, \$1,988)                 | \$0 (\$0, \$0)                     | \$0 (\$0,<br>\$5,190)              | \$0 (\$0,<br>\$4,264)              |
| Mean (SD) Costs, patients with an admission | \$57,355<br>(\$94,213)              | \$28,884<br>(\$49,464)          | \$24,662<br>(\$39,535)             | \$24,782<br>(\$42,525)             | \$32,253<br>(\$59,620)             | \$31,663<br>(\$57,303)             |
| Median (IQR), patients with an admission    | \$29,637<br>(\$11,246,<br>\$60,088) | \$15,048 (\$7,378,<br>\$30,748) | \$13,082<br>(\$6,200,<br>\$26,697) | \$12,916<br>(\$6,198,<br>\$24,765) | \$11,973<br>(\$6,844,<br>\$29,058) | \$14,454<br>(\$8,194,<br>\$31,062) |

|                                  |                                   |                               |                             |                             |                                |                                |
|----------------------------------|-----------------------------------|-------------------------------|-----------------------------|-----------------------------|--------------------------------|--------------------------------|
|                                  |                                   |                               |                             |                             |                                |                                |
| <b>Emergency room visits</b>     | 570<br>(76.0%)                    | 272 (36.3%)                   | 242 (32.3%)                 | 239 (31.9%)                 | 259<br>(34.5%)                 | 254<br>(33.9%)                 |
| Mean (SD) Costs, all patients    | \$1,813<br>(\$4,407)              | \$307 (\$921)                 | \$306 (\$1,019)             | \$345 (\$1,281)             | \$395<br>(\$1,353)             | \$460<br>(\$1,748)             |
| Median (IQR), all patients       | \$598 (\$0,<br>\$1,728)           | \$0 (\$0, \$285)              | \$0 (\$0, \$201)            | \$0 (\$0, \$193)            | \$0 (\$0,<br>\$208)            | \$0 (\$0,<br>\$215)            |
|                                  |                                   |                               |                             |                             |                                |                                |
| <b>Outpatient office visits</b>  | 746<br>(99.5%)                    | 744 (99.2%)                   | 736 (98.1%)                 | 732 (97.6%)                 | 727<br>(96.9%)                 | 722<br>(96.3%)                 |
| Mean (SD) Costs, all patients    | \$8,409<br>(\$6,210)              | \$1,987 (\$1,439)             | \$1,670<br>(\$1,471)        | \$1,597<br>(\$1,530)        | \$1,578<br>(\$1,538)           | \$1,579<br>(\$1,401)           |
| Median (IQR), all patients       | \$7,389<br>(\$5,177,<br>\$10,114) | \$1,728 (\$1,158,<br>\$2,530) | \$1,370 (\$852,<br>\$2,164) | \$1,273 (\$774,<br>\$2,055) | \$1,316<br>(\$802,<br>\$2,038) | \$1,348<br>(\$789,<br>\$2,002) |
|                                  |                                   |                               |                             |                             |                                |                                |
| <b>Other outpatient services</b> | 750<br>(100.0%)                   | 750 (100.0%)                  | 745 (99.3%)                 | 742 (98.9%)                 | 744<br>(99.2%)                 | 738<br>(98.4%)                 |

|                               |                                     |                                |                                   |                                   |                                   |                                   |
|-------------------------------|-------------------------------------|--------------------------------|-----------------------------------|-----------------------------------|-----------------------------------|-----------------------------------|
| Mean (SD) Costs, all patients | \$66,342<br>(\$88,213)              | \$13,188<br>(\$16,322)         | \$12,801<br>(\$20,225)            | \$12,302<br>(\$22,364)            | \$13,404<br>(\$25,174)            | \$14,646<br>(\$32,652)            |
| Median (IQR), all patients    | \$40,026<br>(\$20,968,<br>\$77,466) | \$7,124 (\$3,524,<br>\$15,795) | \$5,966<br>(\$2,558,<br>\$14,400) | \$5,484<br>(\$2,406,<br>\$13,391) | \$5,657<br>(\$2,327,<br>\$15,785) | \$6,165<br>(\$2,079,<br>\$15,647) |
|                               |                                     |                                |                                   |                                   |                                   |                                   |
| <b>Outpatient pharmacy</b>    | 745<br>(99.3%)                      | 742 (98.9%)                    | 736 (98.1%)                       | 735 (98.0%)                       | 734<br>(97.9%)                    | 731<br>(97.5%)                    |
| Mean (SD) Costs, all patients | \$55,775<br>(\$63,061)              | \$11,072<br>(\$12,479)         | \$11,084<br>(\$12,980)            | \$11,182<br>(\$16,013)            | \$11,116<br>(\$14,517)            | \$11,321<br>(\$16,202)            |
| Median (IQR), all patients    | \$32,166<br>(\$15,578,<br>\$80,953) | \$6,684 (\$3,038,<br>\$15,862) | \$6,332<br>(\$2,562,<br>\$15,065) | \$5,685<br>(\$2,208,<br>\$15,043) | \$5,126<br>(\$2,274,<br>\$15,638) | \$5,031<br>(\$1,887,<br>\$15,285) |
|                               |                                     |                                |                                   |                                   |                                   |                                   |

|                                                       |                                       |                                     |                                    |                                     |                                     |                                    |
|-------------------------------------------------------|---------------------------------------|-------------------------------------|------------------------------------|-------------------------------------|-------------------------------------|------------------------------------|
| <b>Mean (SD) total healthcare costs, all patients</b> | \$173,405<br>(\$158,837)              | \$36,991<br>(\$42,337)              | \$32,240<br>(\$36,918)             | \$31,604<br>(\$39,248)              | \$35,825<br>(\$52,259)              | \$36,744<br>(\$55,013)             |
| Median (IQR), all patients                            | \$132,929<br>(\$76,555,<br>\$211,141) | \$26,589<br>(\$14,124,<br>\$44,021) | \$23,179<br>(\$9,853,<br>\$40,635) | \$22,328<br>(\$10,007,<br>\$38,120) | \$22,936<br>(\$10,018,<br>\$39,412) | \$23,994<br>(\$9,196,<br>\$41,509) |

**Supplementary Table 2.** Respiratory-related healthcare utilization and costs (2014 US \$) over 5 year of follow-up for incident RA-ILD patients

|                                             | <b>Year 1-5</b>                    | <b>Year 1</b>                   | <b>Year 2</b>                  | <b>Year 3</b>                     | <b>Year 4</b>                      | <b>Year 5</b>                     |
|---------------------------------------------|------------------------------------|---------------------------------|--------------------------------|-----------------------------------|------------------------------------|-----------------------------------|
| <b>Inpatient admissions</b>                 | 244 (32.6%)                        | 128 (17.1%)                     | 56 (7.5%)                      | 50 (6.7%)                         | 49 (6.5%)                          | 65 (8.7%)                         |
| Mean (SD) Costs, all patients               | \$10,253<br>(\$34,203)             | \$3,993 (\$14,622)              | \$1,312 (\$8,985)              | \$1,692<br>(\$16,878)             | \$1,444<br>(\$9,492)               | \$1,813<br>(\$14,335)             |
| Median (IQR), all patients                  | \$0 (\$0, \$7,288)                 | \$0 (\$0, \$0)                  | \$0 (\$0, \$0)                 | \$0 (\$0, \$0)                    | \$0 (\$0, \$0)                     | \$0 (\$0, \$0)                    |
| Mean (SD) Costs, patients with an admission | \$31,475<br>(\$54,133)             | \$23,366<br>(\$28,338)          | \$17,544<br>(\$28,423)         | \$25,352<br>(\$61,129)            | \$22,067<br>(\$30,648)             | \$20,886<br>(\$44,688)            |
| Median (IQR), patients with an admission    | \$13,791<br>(\$8,173,<br>\$28,639) | \$13,778 (\$8,966,<br>\$25,494) | \$9,889 (\$5,945,<br>\$15,052) | \$8,614<br>(\$5,599,<br>\$16,098) | \$10,770<br>(\$6,606,<br>\$23,591) | \$9,267<br>(\$6,772,<br>\$14,482) |
| <b>Emergency room visits</b>                | 233 (31.1%)                        | 73 (9.7%)                       | 61 (8.1%)                      | 63 (8.4%)                         | 69 (9.2%)                          | 82 (10.9%)                        |

|                                  |                             |                          |                      |                    |                      |                      |
|----------------------------------|-----------------------------|--------------------------|----------------------|--------------------|----------------------|----------------------|
| Mean (SD) Costs, all patients    | \$338 (\$1,632)             | \$49 (\$262)             | \$65 (\$539)         | \$55 (\$338)       | \$60 (\$405)         | \$109 (\$785)        |
| Median (IQR), all patients       | \$0 (\$0, \$190)            | \$0 (\$0, \$0)           | \$0 (\$0, \$0)       | \$0 (\$0, \$0)     | \$0 (\$0, \$0)       | \$0 (\$0, \$0)       |
| <b>Outpatient office visits</b>  | 730 (97.5%)                 | 677 (90.4%)              | 562 (75.0%)          | 531 (70.9%)        | 524 (70.0%)          | 519 (69.3%)          |
| Mean (SD) Costs, all patients    | \$1,393 (\$1,132)           | \$439 (\$378)            | \$259 (\$298)        | \$225 (\$276)      | \$219 (\$270)        | \$250 (\$345)        |
| Median (IQR), all patients       | \$1,111 (\$570, \$1,937)    | \$345 (\$164, \$603)     | \$172 (\$0, \$381)   | \$139 (\$0, \$321) | \$136 (\$0, \$323)   | \$146 (\$0, \$324)   |
| <b>Other outpatient services</b> | 741 (98.9%)                 | 702 (93.7%)              | 548 (73.2%)          | 529 (70.6%)        | 525 (70.1%)          | 535 (71.4%)          |
| Mean (SD) Costs, all patients    | \$8,371 (\$12,248)          | \$2,393 (\$3,849)        | \$1,490 (\$3,409)    | \$1,432 (\$3,982)  | \$1,333 (\$3,343)    | \$1,724 (\$4,901)    |
| Median (IQR), all patients       | \$3,416 (\$1,277, \$10,126) | \$1,054 (\$354, \$2,647) | \$286 (\$0, \$1,359) | \$171 (\$0, \$964) | \$169 (\$0, \$1,140) | \$236 (\$0, \$1,141) |

|                                                       |                        |                    |                    |                    |                    |                    |
|-------------------------------------------------------|------------------------|--------------------|--------------------|--------------------|--------------------|--------------------|
|                                                       |                        |                    |                    |                    |                    |                    |
| <b>Antibiotic claims</b>                              |                        |                    |                    |                    |                    |                    |
| Mean (SD) Costs, all patients                         | \$164 (\$580)          | \$49 (\$332)       | \$33 (\$239)       | \$30 (\$263)       | \$24 (\$121)       | \$28 (\$176)       |
| Median (IQR), all patients                            | \$0 (\$0, \$116)       | \$0 (\$0, \$0)     | \$0 (\$0, \$0)     | \$0 (\$0, \$0)     | \$0 (\$0, \$0)     | \$0 (\$0, \$0)     |
|                                                       |                        |                    |                    |                    |                    |                    |
| <b>Respiratory-related pharmacy claims</b>            | 674 (90.0%)            | 523 (69.8%)        | 480 (64.1%)        | 450 (60.1%)        | 445 (59.4%)        | 431 (57.5%)        |
| Mean (SD) Costs, all patients                         | \$3,613 (\$6,028)      | \$773 (\$1,304)    | \$715 (\$1,290)    | \$713 (\$1,317)    | \$730 (\$1,562)    | \$682 (\$1,374)    |
| Median (IQR), all patients                            | \$816 (\$122, \$4,813) | \$170 (\$0, \$988) | \$89 (\$0, \$885)  | \$48 (\$0, \$867)  | \$45 (\$0, \$724)  | \$27 (\$0, \$637)  |
|                                                       |                        |                    |                    |                    |                    |                    |
| <b>Mean (SD) total healthcare costs, all patients</b> | \$24,133 (\$42,942)    | \$7,696 (\$16,345) | \$3,875 (\$10,579) | \$4,147 (\$18,663) | \$3,808 (\$11,152) | \$4,606 (\$16,010) |

|                            |                                    |                               |                             |                           |                           |                           |
|----------------------------|------------------------------------|-------------------------------|-----------------------------|---------------------------|---------------------------|---------------------------|
| Median (IQR), all patients | \$11,613<br>(\$3,680,<br>\$26,539) | \$2,484 (\$1,121,<br>\$6,645) | \$1,156 (\$304,<br>\$3,564) | \$955 (\$191,<br>\$3,166) | \$913 (\$167,<br>\$3,329) | \$957 (\$163,<br>\$3,706) |
|----------------------------|------------------------------------|-------------------------------|-----------------------------|---------------------------|---------------------------|---------------------------|
